# Supplementary material
Source: PubMed Central journal article supplement (PMC6724742)
Supplement: NIHMS1516895-supplement-SDC_2.pdf [file NIHMS1516895-supplement-SDC_2.pdf]

**Table, Supplemental Digital Content 2. Breast Cancer Knowledge Among Laywomen  
(correct answer in parentheses)**

| Breast Cancer Knowledge Questions                                                                                                                                                                     | Number and percentage of Laywomen with correct response |    |
|-------------------------------------------------------------------------------------------------------------------------------------------------------------------------------------------------------|---------------------------------------------------------|----|
|                                                                                                                                                                                                       | n                                                       | %  |
| With treatment, how many women with early stage breast cancer will eventually die of cancer<br><i>(Most will die of something else)</i>                                                               | 692                                                     | 52 |
| On average which women with early breast cancer live longer?<br><i>(There is no difference)</i>                                                                                                       | 513                                                     | 39 |
| If 100 women with early breast cancer are treated with one breast removed, about how many will develop breast cancer in the “other” breast 5 years after treatment?<br><i>(0-10)</i>                  | 400                                                     | 30 |
| If 100 women with early breast cancer had both breasts removed, how many would have breast cancer come back in the chest wall area of the “other” breast in 5 years after treatment?<br><i>(0-10)</i> | 997                                                     | 75 |
| Who has the highest chance of breast cancer coming back somewhere in the breast?<br><i>(Lumpectomy patients)</i>                                                                                      | 768                                                     | 58 |
| High Breast Knowledge (4-5 correct)                                                                                                                                                                   | 294                                                     | 22 |
